# Supplementary material for: Choline hydroxide based deep eutectic solvent for dissolving cellulose
Source: Royal Society of Chemistry journal article supplement (doi:10.1039/d1gc04130d), 2022-01-01
Supplement: d1gc04130d1.pdf [file d1gc04130d1.pdf]

## Supporting Information

# Choline Hydroxide Based Deep Eutectic Solvent for Dissolving Cellulose†

Yinglin Zhong,<sup>ab</sup> Jingwei Wu,<sup>ab</sup> Hongliang Kang<sup>a</sup> and Ruigang Liu<sup>\*abc</sup>

<sup>a</sup> *Laboratory of Polymer Physics and Chemistry, Beijing National Laboratory of Molecular Sciences, Institute of Chemistry, Chinese Academy of Sciences, Beijing 100190, China. E-mail: rgliu@iccas.ac.cn*

<sup>b</sup> *College of Chemistry, University of Chinese Academy of Sciences, Beijing 100049, China.*

<sup>c</sup> *Savaid Medical School, University of Chinese Academy of Sciences, Beijing 100049, China..*

**Table S1.** POM images obtained by polarizing microscope.

| HBA  | HBD                              | Ratio | Temp      | Dissolution time | Photo                                                                                | Solubility |
|------|----------------------------------|-------|-----------|------------------|--------------------------------------------------------------------------------------|------------|
| ChCl | Urea                             | 1:2   | 100°C     | 24h              |    | non        |
|      | Thiourea                         | 1:2   | 100°C     | 24h              |    | non        |
|      | Resorcinol                       | 1:1   | 100°C     | 24h              |    | non        |
|      | Imidazole                        | 3:7   | 100°C     | 24h              |    | non        |
|      | Acetic acid                      | 1:1   | 60°C      | 24h              |    | non        |
|      | KOH <sup>a</sup>                 | 1:4   | 100°C     | -                | -                                                                                    | -          |
|      | <i>l</i> -Histidine <sup>b</sup> | 1:1   | 100-140°C | -                | -                                                                                    | -          |
| ChOH | Thiourea                         | 1:2   | 70°C      | 2h               |  | non        |
|      | Resorcinol                       | 1:1   | 100°C     | 2h               |  | non        |
|      | Imidazole                        | 3:7   | 100°C     | 2h               |  | non        |
|      | <i>l</i> -Histidine              | 1:1   | 100°C     | 2h               |  | non        |
|      | Serine                           | 1:1   | 100°C     | 2h               |  | non        |

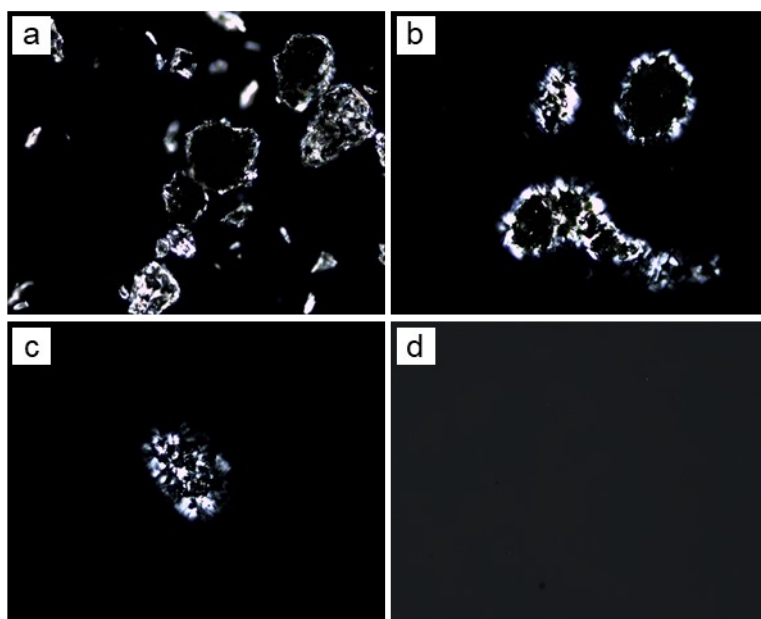

**Figure S1.** POM images of MCC (2 wt.)/ChOH/Ur mixture sandwiched between two glass slides for (a) 0 min, (b) 15min, (c) 20min, and (d) 30min at 45°C.

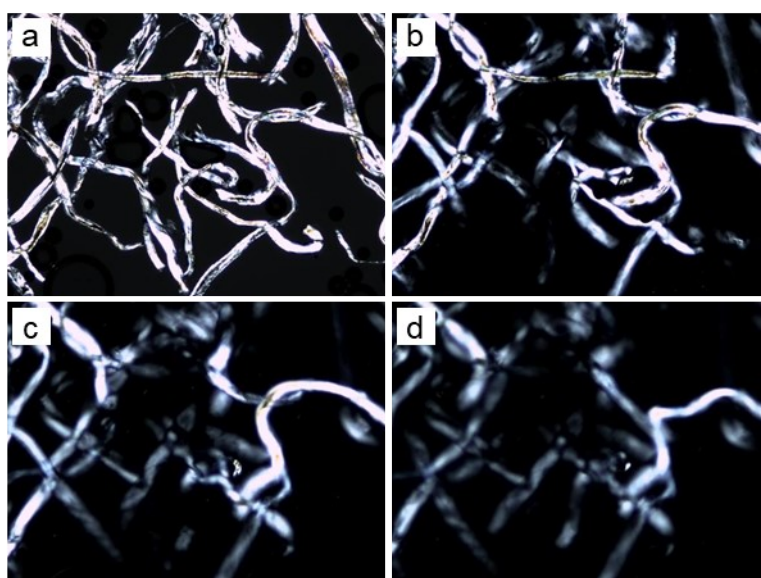

**Figure S2.** POM images of cellulose (DP = 926, 1 wt.)/ChOH/Urea mixture sandwiched between two glass slides for (a) 0 min, (b) 1 min, (c) 10 min, and (d) 20 min at 70°C.

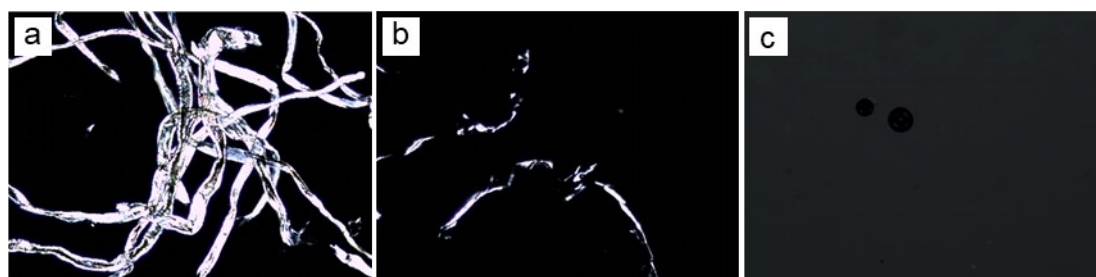

**Figure S3.** POM images of cellulose (DP = 926, 1 wt.)/ChOH/Urea mixture stirring at 70°C for (a) 0 min, (b) 5 min and (c) 10 min.

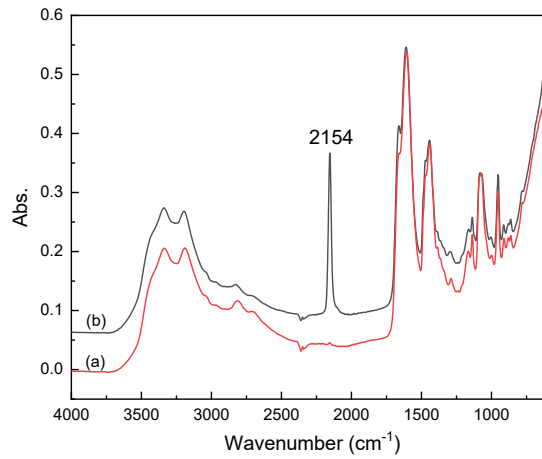

**Figure S4.** ATR-FTIR spectra of cellulose/ChOH/Ur mixture (a) before and (b) after kept at 100 °C for 15 hrs.

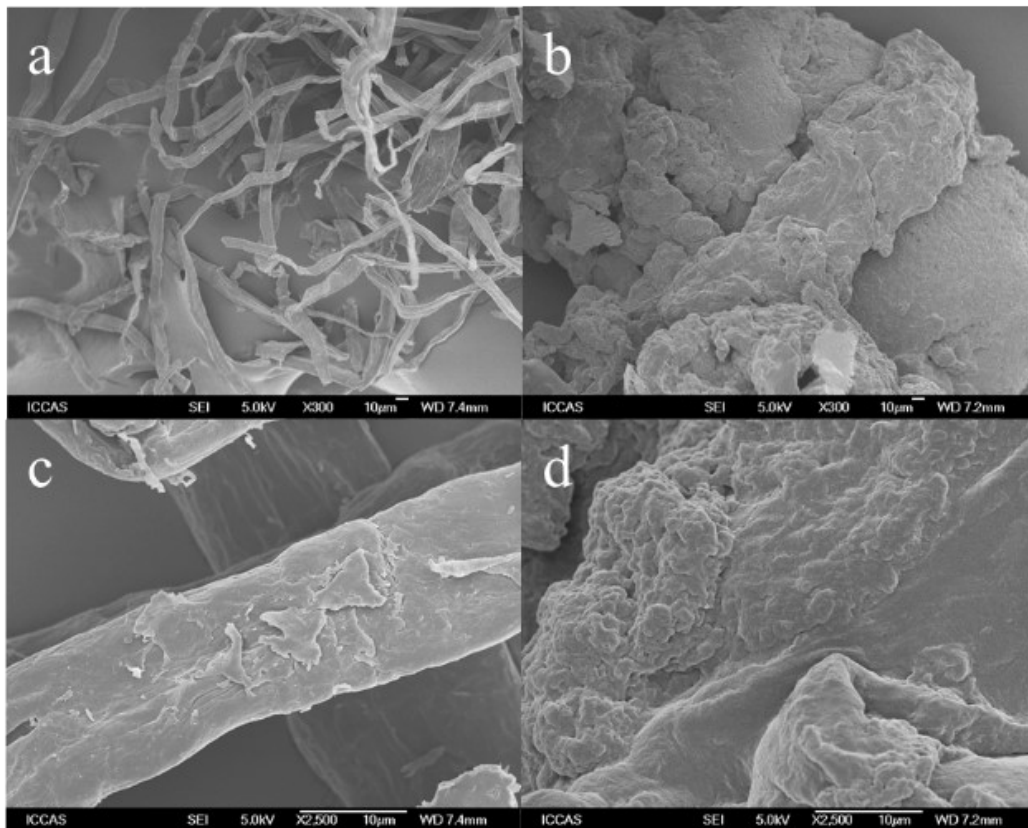

**Figure S5.** Scanning electron microscope (SEM) photos of Pulp and RePulp, a) pulp with 300x; b) regenerated pulp with 300x; c) pulp with 2500x; d) regenerated pulp with 2500x.

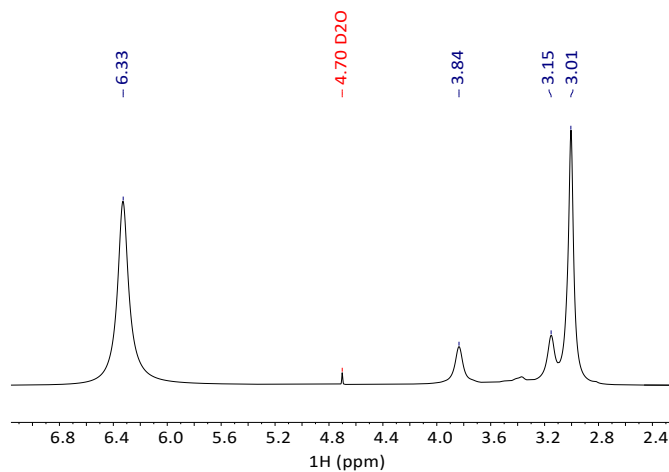

**Figure S6.** <sup>1</sup>H NMR spectra of ChOH/urea DES, deuterium oxide as external reference.

**Table S2.** The data obtained from Ubbelohde viscosity experiment

| Time (day)                                    | 0     | 1     | 3     | 5     | 7     |
|-----------------------------------------------|-------|-------|-------|-------|-------|
| [ $\eta$ ] <sup>a</sup> (ml·g <sup>-1</sup> ) | 458.3 | 388.2 | 375.0 | 371.7 | 377.0 |
| DP                                            | 926   | 770   | 741   | 734   | 745   |
| Extend of degradation (%)                     | -     | 16.8  | 19.9  | 20.7  | 19.5  |

<sup>a</sup> [ $\eta$ ] was the average of [ $\eta$ 1] and [ $\eta$ 2] acquired from the intercepts in figure S4.

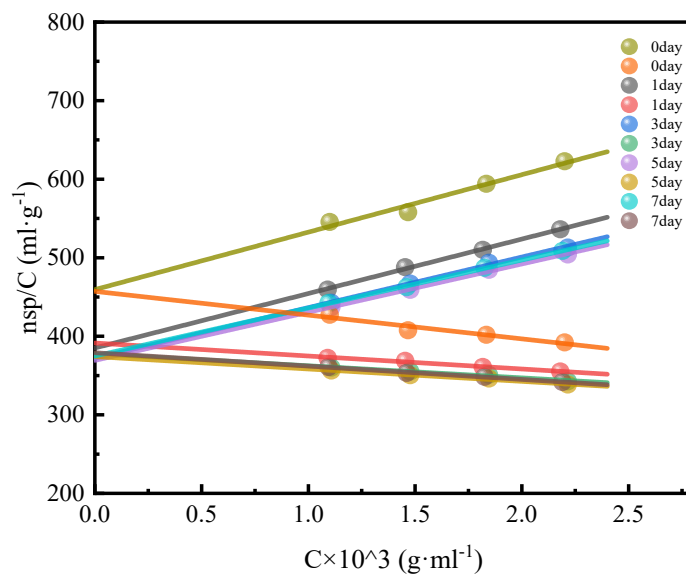

**Figure S7.** Relationship between [ $\eta$ ] and concentration of cotton linter pulp in CED (0.5M; 25°C).

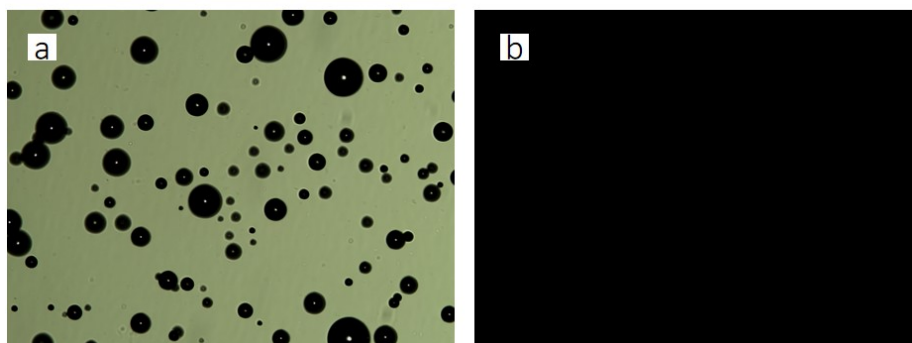

**Figure S8.** Images of MCC (8 wt.%) dissolved in recycled-3 ChOH/Urea mixture under (a) normal light, (b) orthogonal polarized light.
